# Supplementary material for: Affidamento teraupetico di condannati tossicodipendenti e preculsioni introdotte dalla "ex Cierelli"
Source: PLOS journal article supplement (doi:10.1371/journal.pone.0217069), 2009-01-01
Supplement: S3 (10.1371/journal.pone.0217069.s003) [file journal.pone.0217069.s003]

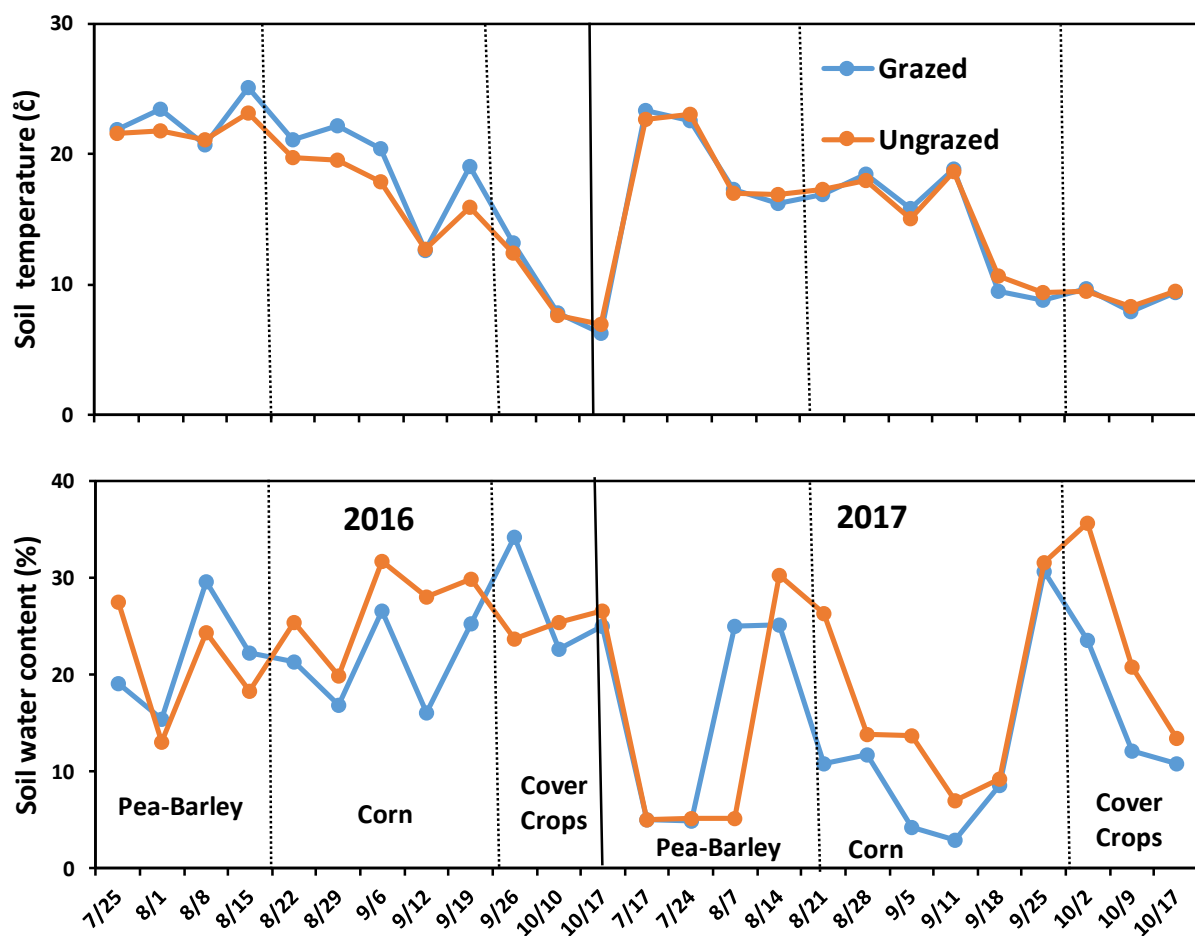

**S2 Fig. Soil temperature and water content as influenced by grazing during the grazing period for 2016 and 2017.**
